# Supplementary material for: Intersection of Diet and Exercise with the Gut Microbiome and Circulating Metabolites in Male Bodybuilders: A Pilot Study
Source: MDPI journal article supplement (doi:10.3390/metabo12100911), 2022-09-27
Supplement: s1 [file s1]

Table S1: Body composition, exercise training, energy intake and macronutrient intake measured in the seven days prior to each time point.

| Participant | Timepoint | Lean mass (kg) | Fat mass (kg) | Resistance training (kg/week) | Aerobic training (minutes/week) | Energy (kJ/kg) | Protein (g/kg) | Fat (g/kg) | Carbohydrate (g/kg) |
|-------------|-----------|----------------|---------------|-------------------------------|---------------------------------|----------------|----------------|------------|---------------------|
| P1          | PRE8      | 73.5           | 5.39          | 87832                         | 27                              | 129            | 3.29           | 1.08       | 1.71                |
|             | PRE1      | 71.7           | 5.04          | 34346                         | 0                               | 184            | 4.42           | 1.38       | 3.19                |
|             | POST4     | 74.1           | 6.98          | 44884                         | 0                               | 150            | 3.07           | 1.04       | 3.28                |
| P2          | PRE8      | 55.3           | 11.51         | 42010                         | 80                              | 84             | 2.03           | 0.40       | 1.79                |
|             | PRE1      | 55.1           | 10.21         | 48369                         | 150                             | 90             | 2.39           | 0.28       | 1.91                |
|             | POST4     | 56.2           | 14.31         | 23341                         | 0                               | 128            | 0.91           | 0.77       | 4.62                |
| P3          | PRE8      | 74.3           | 7.74          | 51297                         | 124                             | 179            | 2.74           | 1.41       | 4.44                |
|             | PRE1      | 73.9           | 4.44          | 38950                         | 16                              | 132            | 2.55           | 1.00       | 2.61                |
|             | POST4     | 75.9           | 7.45          | 29545                         | 0                               | 263            | 3.17           | 2.22       | 7.27                |
| P4          | PRE8      | 70.4           | 6.68          | 68370                         | 112                             | 137            | 2.63           | 0.69       | 3.55                |
|             | PRE1      | 69.0           | 4.40          | 32970                         | 40                              | 118            | 2.14           | 0.59       | 3.26                |
|             | POST4     | 71.5           | 6.47          | 100441                        | 20                              | 149            | 2.72           | 0.93       | 3.79                |
| P5          | PRE8      | 63.3           | 3.64          | 89818                         | 200                             | 119            | 2.64           | 0.97       | 2.09                |
|             | PRE1      | 61.6           | 2.76          | 68168                         | 190                             | 105            | 1.92           | 0.61       | 2.83                |
|             | POST4     | 64.8           | 3.87          | 60792                         | 0                               | 157            | 2.58           | 1.42       | 3.63                |



Table S3: Circulating metabolites significantly different ( $p < 0.05$ ) by timepoint.

| Super pathway | Pathway                                | Metabolite               | KEGG   | HMDB      | Significant difference by timepoint (p-value)* | Mean fold change (post-competition / pre-competition) |
|---------------|----------------------------------------|--------------------------|--------|-----------|------------------------------------------------|-------------------------------------------------------|
| Amino acid    | Creatine metabolism                    | Guanidinoacetic acid     | C00581 | HMDB00128 | 0.003                                          | 0.3                                                   |
|               | Glycine, serine, threonine metabolism  | L-Homoserine             | C00263 | HMDB00719 | 0.024                                          | 1.2                                                   |
|               |                                        | $\alpha$ -Ketobutyrate   | C00109 | HMDB00005 | 0.001                                          | 0.4                                                   |
|               | Lysine metabolism                      | Saccharopine             | -      | HMDB00279 | 0.004                                          | 1.3                                                   |
| Cofactor      | Nicotinate and nicotinamide metabolism | NAD <sup>+</sup>         | C00003 | HMDB00902 | 0.001                                          | 1.2                                                   |
| Lipid         | Fatty acid metabolism                  | Acetylcarnitine          | C02571 | HMDB00201 | 0.007                                          | 0.8                                                   |
|               | Fatty acid synthesis                   | Malonate                 | C00383 | HMDB00691 | 0.003                                          | 0.2                                                   |
|               | Ketone body                            | $\beta$ -Hydroxybutyrate | C01089 | HMDB00357 | 0.003                                          | 0.2                                                   |
|               | Phospholipid metabolism                | Choline                  | C00114 | HMDB00925 | 0.035                                          | 1.2                                                   |

\*Kruskal-Wallis test
