# Supplementary material for: Intersection of Diet and Exercise with the Gut Microbiome and Circulating Metabolites in Male Bodybuilders: A Pilot Study
Source: MDPI journal article supplement (doi:10.3390/metabo12100911), 2022-09-27
Supplement: s1 [file s1]

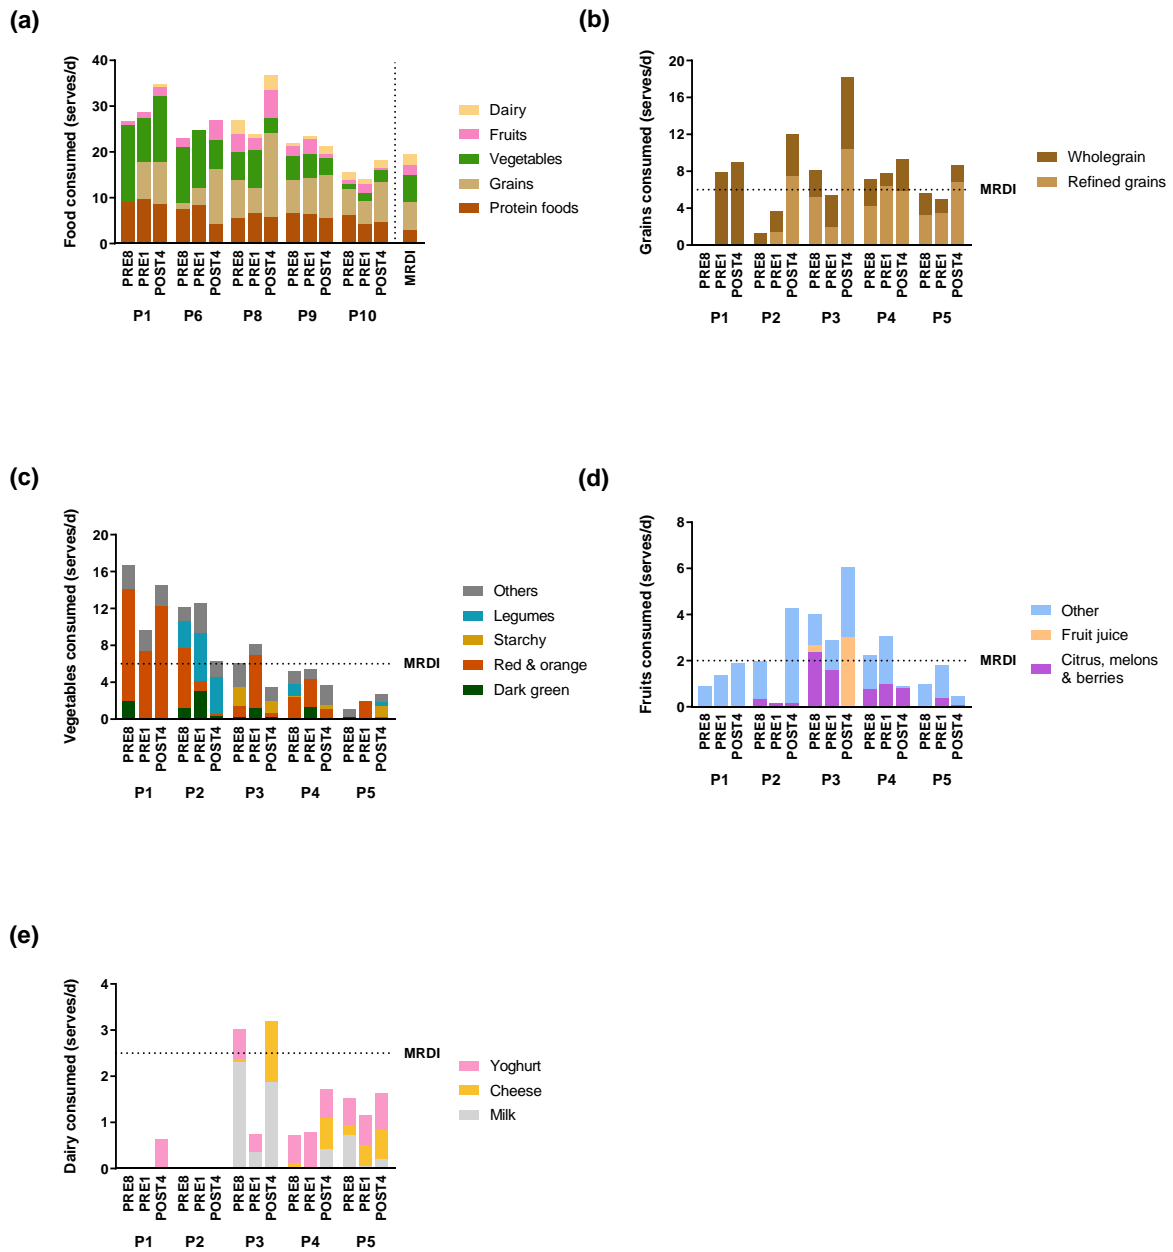

Figure S1: Serves of food consumed as compared to the minimum recommended daily intake (MRDI) [46].

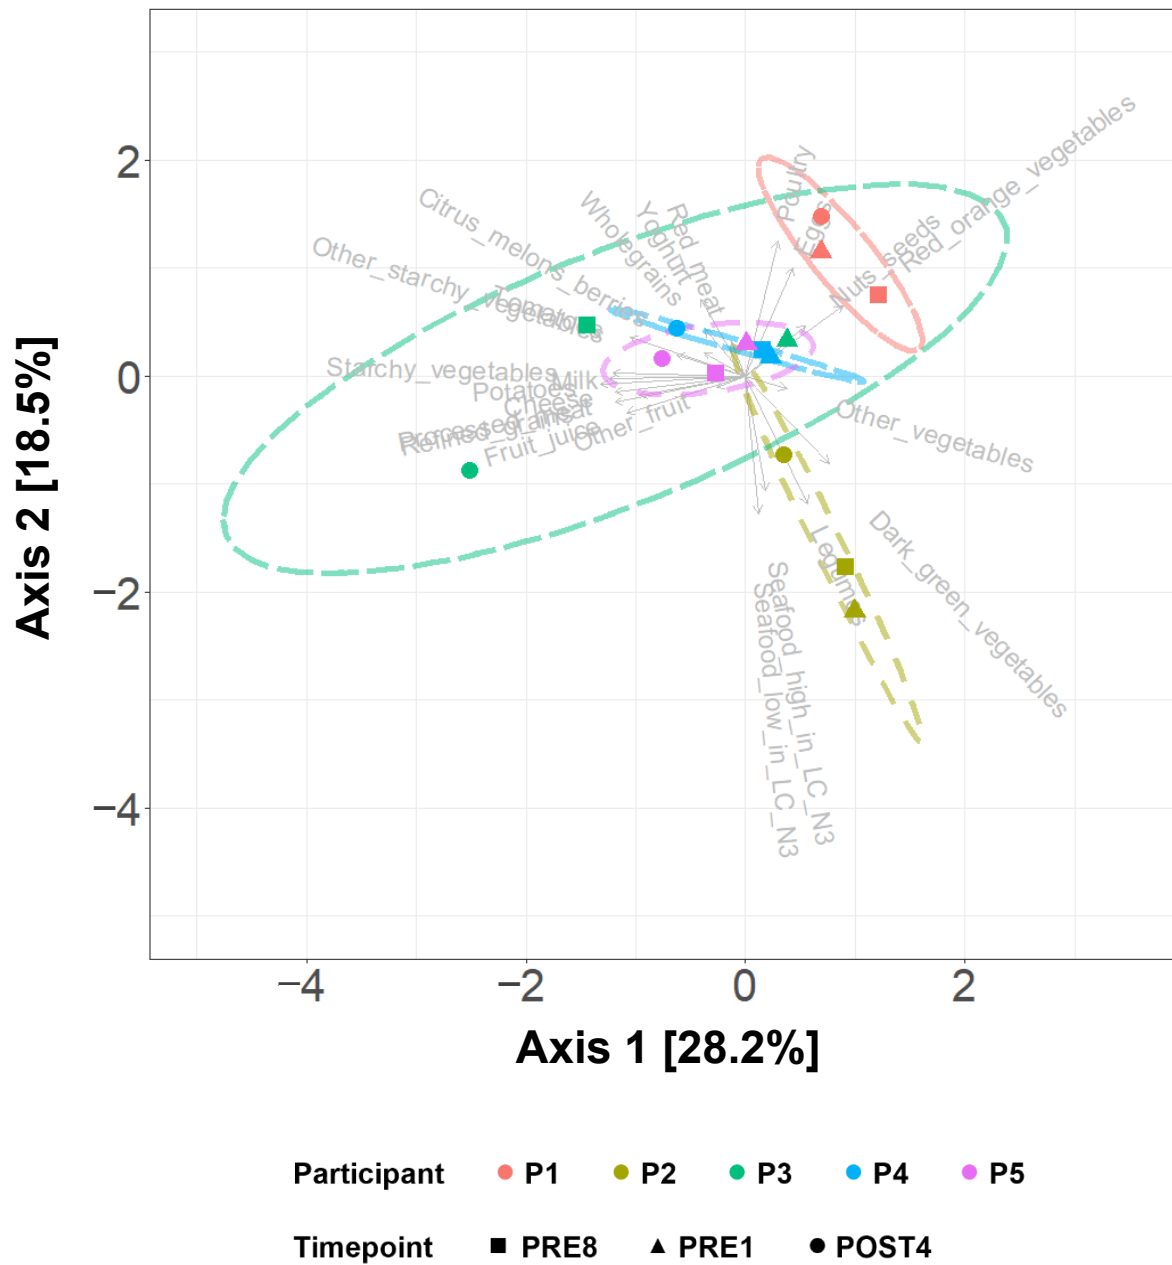

Figure S2: Principal component analysis of food items; Vectors indicate the contribution of each food item to the diet; Ellipses indicate 95% confidence intervals of samples from each participant
